# Supplementary material for: Safety and antitumor activity of the anti–PD-1 antibody pembrolizumab in patients with advanced, PD-L1–positive papillary or follicular thyroid cancer
Source: PubMed Central journal article supplement (PMC6399859; doi:10.1186/s12885-019-5380-3), 2019-03-04
Supplement: 12885_2019_5380_MOESM1_ESM.pdf [file 12885_2019_5380_MOESM1_ESM.pdf]

**Supplemental Table:** Institutional Review Board or Ethics Committee of Each Participating Site

| <b>Country</b>     | <b>Site</b> | <b>PI</b>                          | <b>Site</b>                                              | <b>IRB/EC Name</b>                                                           |
|--------------------|-------------|------------------------------------|----------------------------------------------------------|------------------------------------------------------------------------------|
| Canada             | 0016        | Siu, Lillian                       | Princess Margaret Cancer Centre                          | University Health Network Research Ethics Board                              |
| France             | 0028        | Soria, Jean-Charles (Andrea Varga) | Institut Gustave Roussy,                                 | Comité de protection des personnes Ile-de-France III                         |
| Italy              | 0052        | Braud, Filippo De                  | Fondazione IRCCS Istituto Nazionale Tumori,              | Istituto Nazionale dei Tumori. Fondazione IRCCS, Comitato Etico Indipendente |
| Japan              | 0031        | Tamura, Kenji                      | National Cancer Center Hospital Tokyo                    | Institutional Review Board for National Cancer Center                        |
| Japan              | 0032        | Doi, Toshihiko                     | National Cancer Center Hospital East                     | Institutional Review Board for National Cancer Center                        |
| Korea, Republic of | 0034        | Bang, Yung-Jue                     | Seoul National University Hospital                       | Seoul National University Hospital, IRB Biomedical Research Institute        |
| Taiwan             | 0037        | Hsu, Chiun                         | National Taiwan University Hospital,                     | National Taiwan University Hospital, Ethics Review Committee                 |
| United States      | 0001        | Cohen, Roger                       | Abramson Cancer Center at the University of Pennsylvania | University of Pennsylvania, Office of Regulatory Affairs                     |

|               |      |                                                          |                                                   |                                                                      |
|---------------|------|----------------------------------------------------------|---------------------------------------------------|----------------------------------------------------------------------|
|               |      |                                                          |                                                   | Institutional Review Board                                           |
| United States | 0002 | Borazanci, Erkut (Ramesh K. Ramanathan, MD/Samuel Ejadi) | AZ                                                | Western Institutional Review Board                                   |
| United States | 0003 | Piha-Paul, Sarina                                        | The University of Texas MD Anderson Cancer Center | University of Texas MD Anderson Cancer Center Institute Review Board |
| United States | 0007 | Rugo, Hope                                               | University of California, San Francisco           | University of California, San Francisco Committee on Human Research  |
| United States | 0009 | Mehnert, Janice (Antoinette Tan, MD)                     | Rutgers Cancer Institute of New Jersey            | Western Institutional Review Board                                   |
| United States | 0010 | Ancell, Kristin (Igor Puzanov/Aimee Agnel)               | Vanderbilt University School of Medicine          | Vanderbilt University Institutional Review Board                     |
